# Supplementary material for: Medical Care Costs Associated with Cancer Survivorship in the United States
Source: Oxford University Press journal article supplement (doi:10.1158/1055-9965.epi-19-1534), 2020-06-10
Supplement: 10559965epi191534-sup-233834_2_supp_6199049_q82g4t.docx [file 10559965epi191534-sup-233834_2_supp_6199049_q82g4t.docx]

## Supplementary Table 1. Cancer-attributable annualized average costs* in 2019 US dollars for oral prescription drugs (Medicare Part D) by cancer site, phases of care and Part D low income subsidy (LIS) status.

*Costs calculated from 2007–2013 Medicare claims for patients diagnosed with cancer between 2000 and 2012 and 65 years or older. Phases of care are: initial, first 12 months after each diagnosis; end-of-life (EOL), the 12 months before death, and the continuing, the months in-between the initial and the EOL phases. AML= Acute Myeloid Leukemia; CLL= Chronic Lymphocytic Leukemia; CML= Chronic Myeloid Leukemia; NSC=Non-Small Cell; SC= Small Cell.
